# Supplementary material for: Injectable Granular Hydrogels Enable Avidity-Controlled Biotherapeutic Delivery
Source: PubMed Central journal article supplement (PMC10934254; doi:10.1021/acsbiomaterials.3c01906), 2024-02-15
Supplement: ab3c01906_si_001.pdf [file ab3c01906_si_001.pdf]

## *Supporting Information*

# **Injectable Granular Hydrogels Enable Avidity-Controlled Biotherapeutic Delivery**

Arielle M. D'Elia<sup>1</sup>, Olivia L. Jones<sup>1</sup>, Gabriela Canziani<sup>2</sup>, Biplab Sarkar<sup>1</sup>, Irwin Chaiken<sup>2</sup>,  
Christopher B. Rodell<sup>1\*</sup>

*<sup>1</sup>School of Biomedical Engineering, Science and Health Systems, Drexel University,  
Philadelphia, PA, USA*

*<sup>2</sup>Department of Biochemistry and Molecular Biology, Drexel University College of Medicine,  
Philadelphia, PA, USA*

\* Correspondence to: C.B. Rodell ([christopher.b.rodell@drexel.edu](mailto:christopher.b.rodell@drexel.edu))

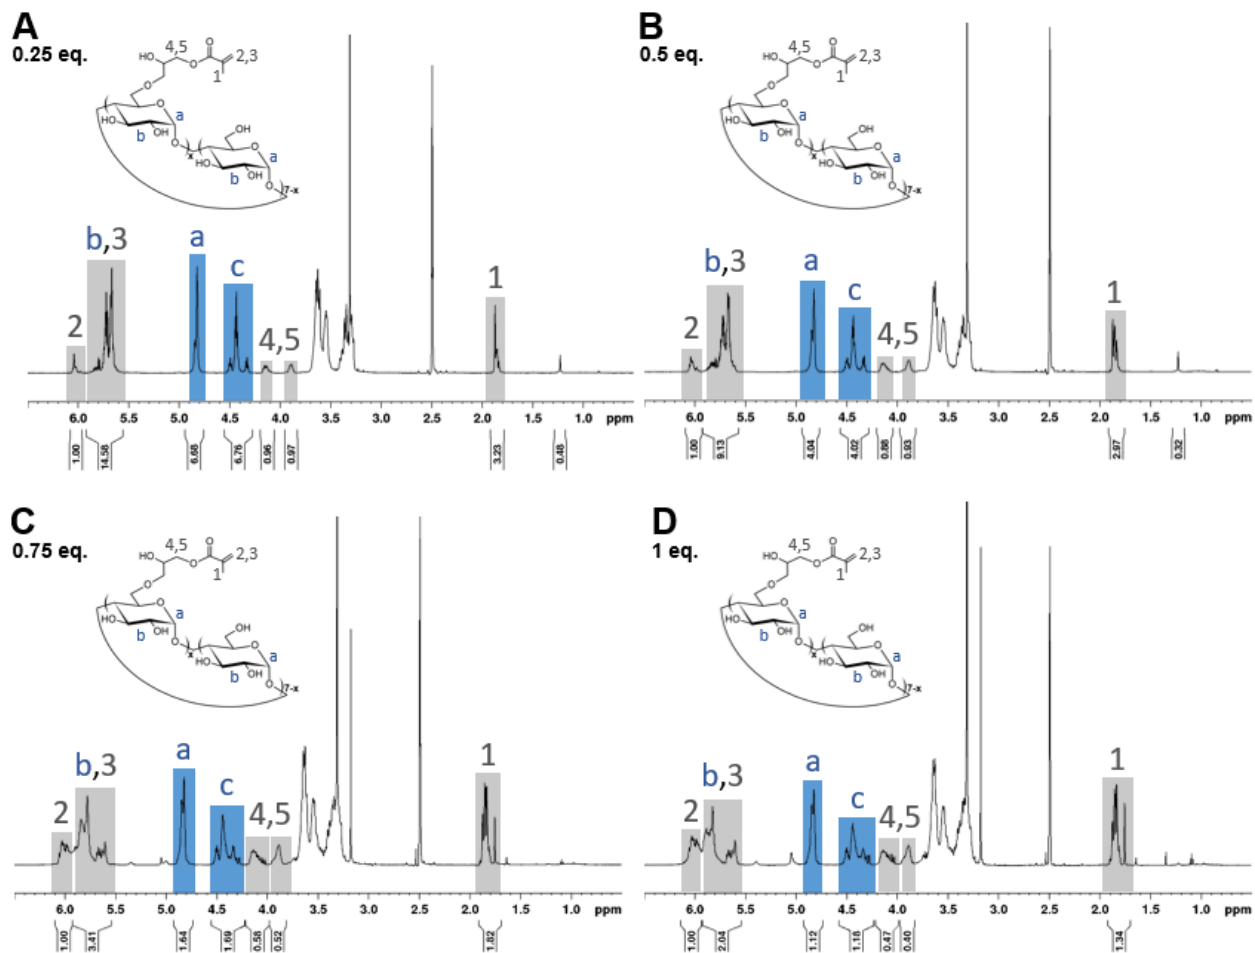

**Figure S1.**  $^1\text{H-NMR}$  spectra of (A) 0.25 eq., (B) 0.5 eq., (C) 0.75 eq., and (D) 1 eq. GMA per glucose repeat unit. The degree of substitution is determined by the ratio of the methyl peak (3H, ca. 1.9 ppm) relative to the position 1 anomeric proton (7H, ca. 4.8 ppm).

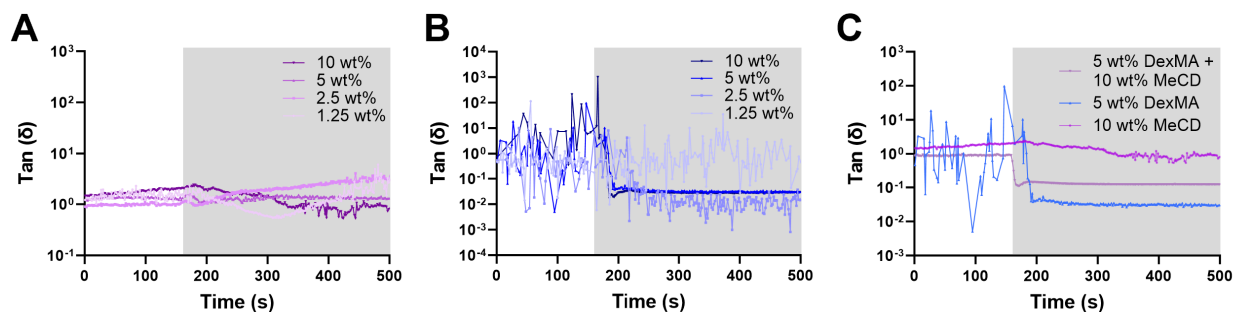

**Figure S2.** Viscoelastic properties are tuned via DexMA incorporation. Representative oscillatory time sweeps (1 Hz, 1.0% strain) of photo-crosslinking with UV exposure ( $10 \text{ mW/cm}^2$ , 5 min as indicated by the shaded area) for MeCD (A), DexMA (B), and composite (C) hydrogels. A clear transition to a solid hydrogel ( $\tan(\delta) < 1$ ) was observed for DexMA at concentrations of 2.5 wt% or greater.

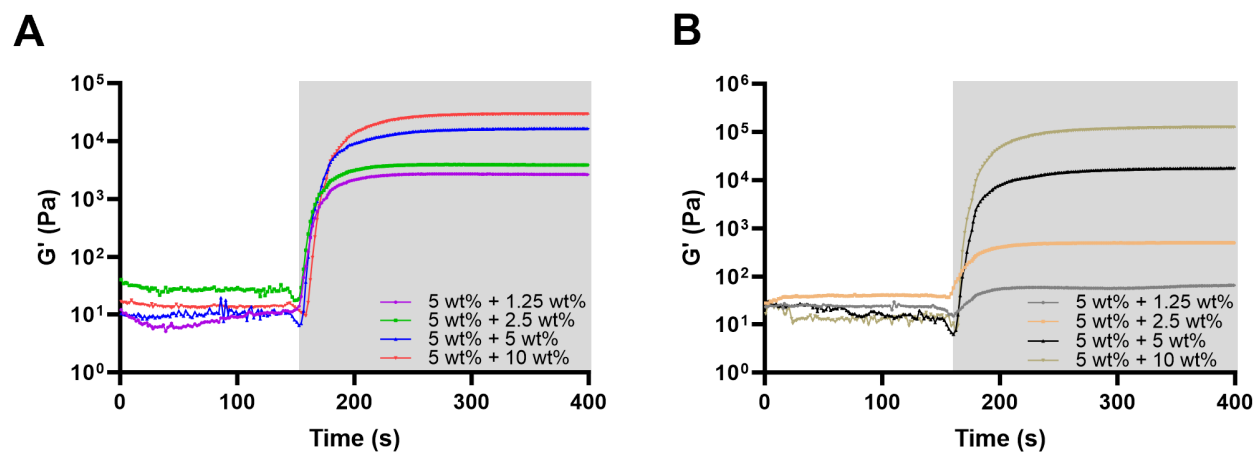

**Figure S3.** Rheological characterization of hydrogel formation. Representative oscillatory time sweeps of photo-crosslinking with UV exposure ( $10 \text{ mW/cm}^2$ , 5 min as indicated by the shaded area) showing shear storage moduli ( $G'$ ) of 5%<sub>w/v</sub> DexMA with increasing MeCD (A) and 5%<sub>w/v</sub> MeCD with increasing DexMA (B), each at 1 Hz, 1.0% strain.

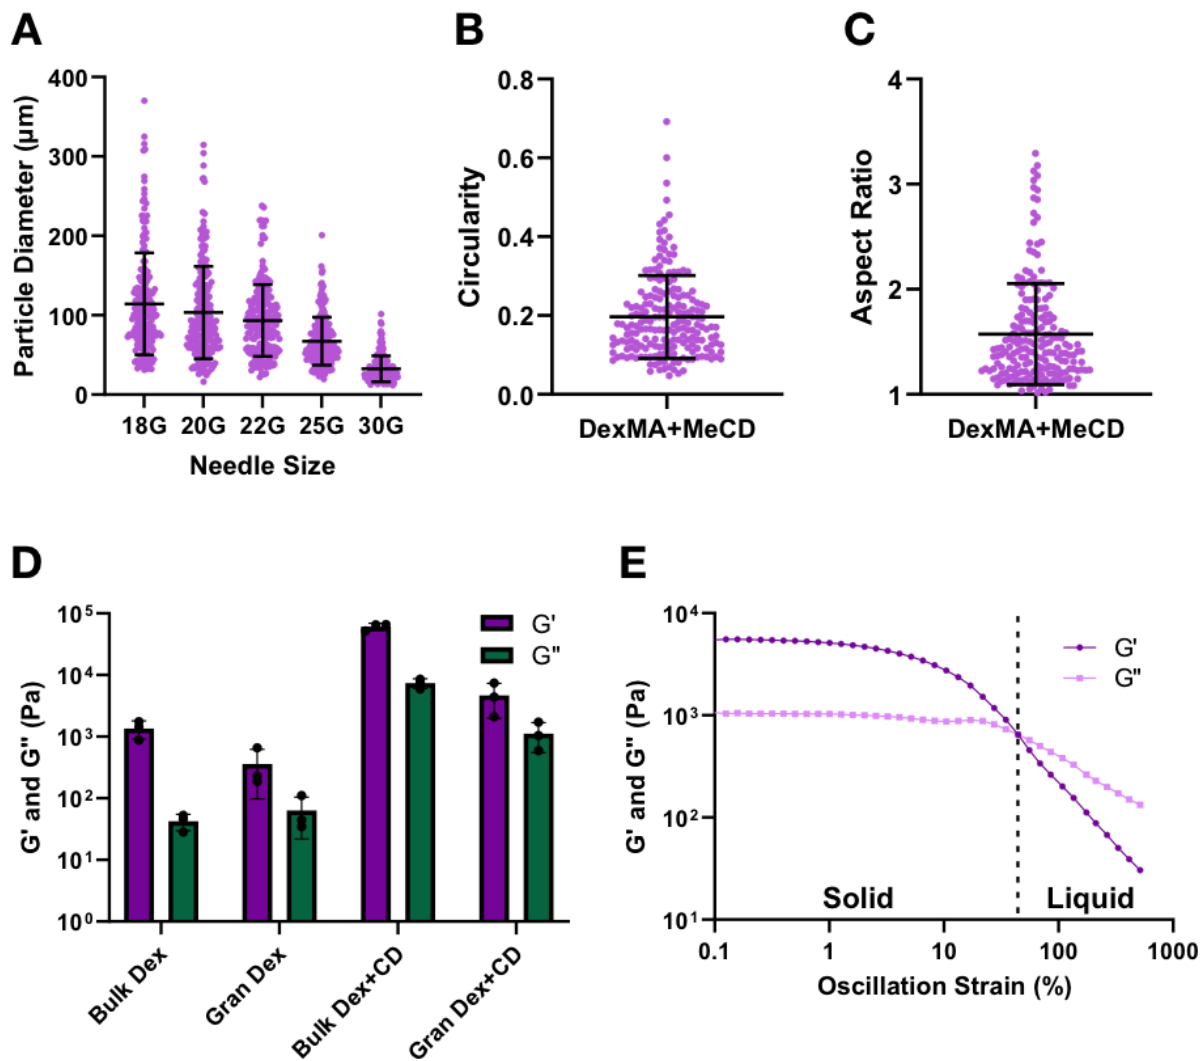

**Figure S4.** Granular hydrogel formation and mechanical properties. (A) Particle diameter throughout the extrusion process of 5%<sub>w/v</sub> DexMA + 10%<sub>w/v</sub> MeCD gels; mean ± SD; n=200 particles. (B, C) Corresponding quantification of particulate circularity and aspect ratio for final microgels obtained after 30G needle extrusion; mean ± SD, n=200. (D) Storage (G', purple) and loss (G'', green) moduli comparison of granular and bulk hydrogels composed of 5%<sub>w/v</sub> DexMA and 5%<sub>w/v</sub> DexMA + 10%<sub>w/v</sub> MeCD (1.0% strain, 1 Hz); mean ± SD, n=3. (E) Strain amplitude sweep of 5%<sub>w/v</sub> DexMA + 10%<sub>w/v</sub> MeCD granular hydrogels (1 Hz); G' (dark purple, circle), G'' (light purple, circle).

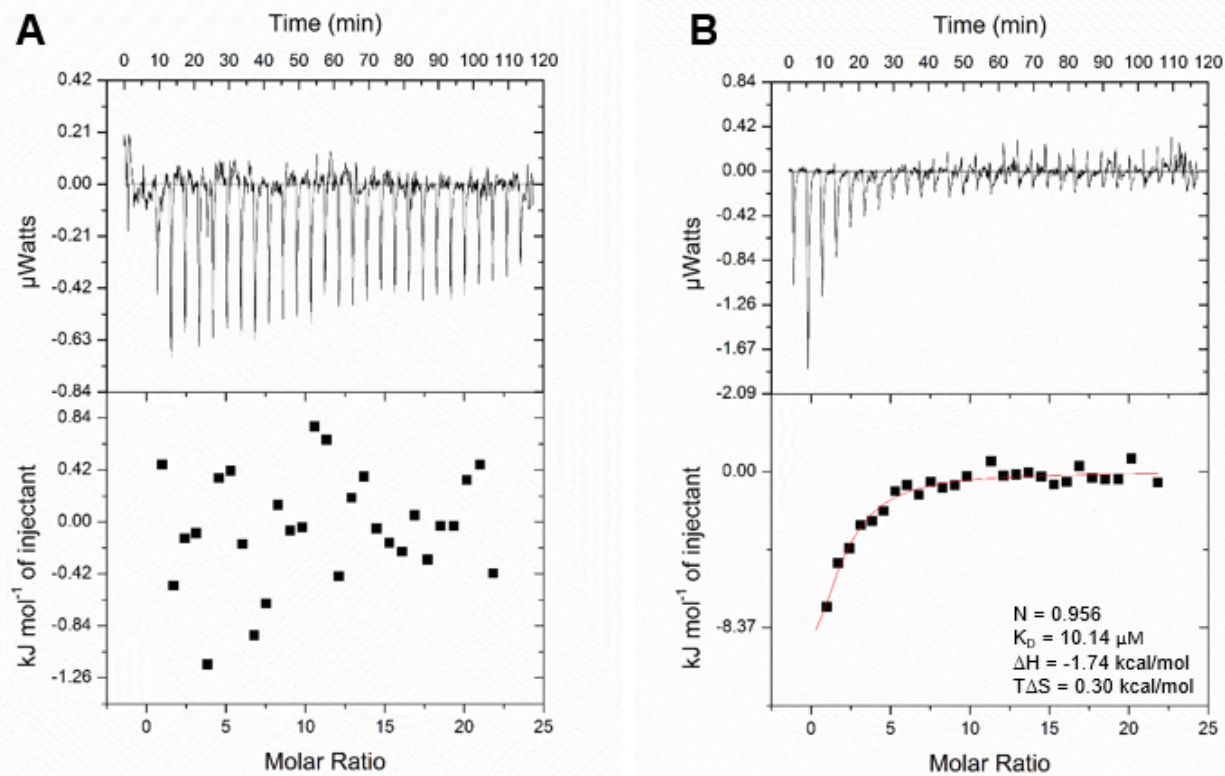

**Figure S5.** Isothermal titration calorimetry (ITC) thermodynamic evaluation. Raw thermograms and binding isotherms of controls, including unmodified BSA (A) and soluble Ad (B) to CD.

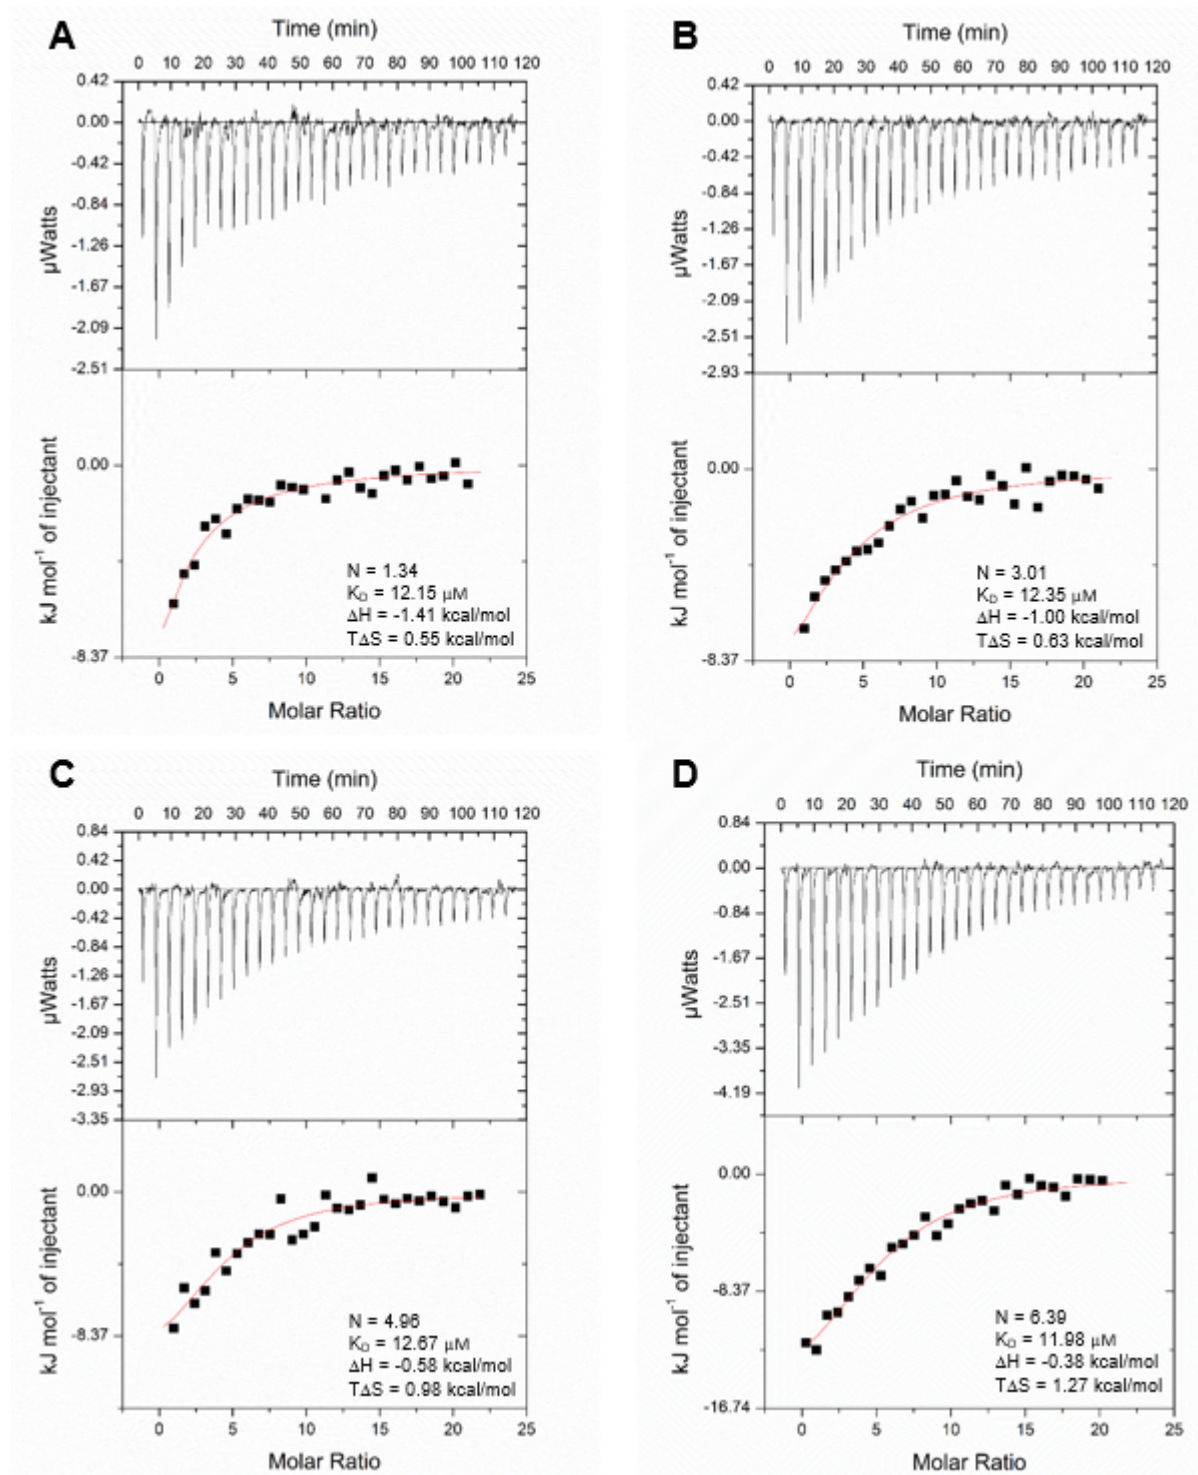

**Figure S6.** Isothermal titration calorimetry (ITC) thermodynamic evaluation. Raw thermograms and binding isotherms of Ad-BSA conjugates (A-D).



| <b>Equivalents<br/>adamantane-BSA</b> | <b>K<sub>D</sub> (nM)</b> | <b>Residuals square<br/>(43570 average data<br/>points)</b> |
|---------------------------------------|---------------------------|-------------------------------------------------------------|
| 1.25                                  | 356                       | 0.89                                                        |
| 2.50                                  | 253                       | 0.85                                                        |
| 5.00                                  | 207                       | 0.69                                                        |
| 10.00                                 | 164                       | 0.51                                                        |

**Table 1.** Dissociation constant of Ad-BSA, determined by SPR. The equilibrium dissociation constant ( $K_D$ ) reflects the apparent avidity of multimeric adamantane binding to surface-coupled  $\beta$ -cyclodextrin. The  $K_D$  shifts to lower (tighter) nM values with increasing adamantane content of BSA. Ad-BSA conjugates binding to  $\beta$ -cyclodextrin was assessed in individual kinetic titration cycles and the resulting data fit to a 1:1 interaction model to determine the avidity of multimeric binding.
